# Supplementary material for: The Molecular Mechanism of Transport by the Mitochondrial ADP/ATP Carrier
Source: PubMed Central journal article supplement (PMC6349463; doi:10.1016/j.cell.2018.11.025), 2019-01-24
Supplement: mmc1.pdf [file mmc1.pdf]

**Cell, Volume 176**

**Supplemental Information**

**The Molecular Mechanism of Transport**

**by the Mitochondrial ADP/ATP Carrier**

**Jonathan J. Ruprecht, Martin S. King, Thomas Zögg, Antoniya A. Aleksandrova, Els Pardon, Paul G. Crichton, Jan Steyaert, and Edmund R.S. Kunji**

**Table S1. Data collection, refinement and validation statistics. Related to STAR methods.**

|                                                              | TtAac-Nb complex <sup>†</sup> | TtAac <sup>‡</sup>                                    |
|--------------------------------------------------------------|-------------------------------|-------------------------------------------------------|
| <b>Data collection*</b>                                      |                               |                                                       |
| Space group                                                  | <i>P</i> 3 <sub>2</sub> 21    | <i>P</i> 2 <sub>1</sub> 2 <sub>1</sub> 2 <sub>1</sub> |
| Cell dimensions                                              |                               |                                                       |
| <i>a</i> , <i>b</i> , <i>c</i> (Å)                           | 75.65, 75.65, 295.48          | 76.59, 77.26, 96.54                                   |
| $\alpha$ , $\beta$ , $\gamma$ (°)                            | 90.0, 90.0, 120.0             | 90.0, 90.0, 90.0                                      |
| Resolution (Å)                                               | 29.35-3.30 (3.43-3.30)        | 96.54-3.85 (4.24-3.85)                                |
| <i>R</i> <sub>merge</sub>                                    | 0.063 (0.688)                 | 0.103 (0.960)                                         |
| <i>I</i> / $\sigma$ <i>I</i>                                 | 12.1 (2.3)                    | 9.1 (1.4)                                             |
| Completeness (spherical, %)                                  | 85.1 (40.3)                   | 56.9 (13.6)                                           |
| Completeness (ellipsoidal, %)                                | 91.9 (88.8)                   | 88.5 (73.2)                                           |
| Redundancy                                                   | 4.7 (4.7)                     | 3.5 (3.5)                                             |
| CC(1/2)                                                      | 1.000 (0.823)                 | 0.999 (0.558)                                         |
| <b>Refinement</b>                                            |                               |                                                       |
| Resolution (Å)                                               | 29.35-3.30                    |                                                       |
| No. reflections work set/test set                            | 13203/628                     |                                                       |
| <i>R</i> <sub>work</sub> / <i>R</i> <sub>free</sub> (Buster) | 25.2/28.3                     |                                                       |
| No. atoms                                                    |                               |                                                       |
| Protein                                                      | 3064                          |                                                       |
| Ligand/ion                                                   | 182                           |                                                       |
| Water                                                        | 0                             |                                                       |
| Mean <i>B</i> -factors (Å <sup>2</sup> )                     |                               |                                                       |
| Protein                                                      | 110.8                         |                                                       |
| BKA/CDL/PEG                                                  | 80.4/136.4/89.6               |                                                       |
| R.m.s. deviations                                            |                               |                                                       |
| Bond lengths (Å)                                             | 0.008                         |                                                       |
| Bond angles (°)                                              | 0.87                          |                                                       |
| Ramachandran favoured (%)                                    | 96.8                          |                                                       |
| Ramachandran outliers (%)                                    | 0.0                           |                                                       |
| Molprobit score                                              | 1.47                          |                                                       |

\*Values in parentheses are for highest-resolution shell.

<sup>†</sup>Diffraction data collected from one crystal, which diffracted anisotropically to 3.51 Å along 0.894 *a*\*- 0.447 *b*\*, 3.51 Å along *b*\* and 3.04 Å along *c*\*.

<sup>‡</sup>Diffraction data collected from one crystal, which diffracted anisotropically to 3.61 Å along *a*\*, 5.6 Å along *b*\*, and 4.4 Å along *c*\*.

**Table S2. DNA oligonucleotide sequences. Related to STAR methods.**

| Oligonucleotide         | Sequence 5'-3'                                                                                    |
|-------------------------|---------------------------------------------------------------------------------------------------|
| TtAac no tag<br>forward | CATGACATGTCTAAACAAGAACTAAAATTTTAGGAATGCCACCCTTCGTG                                                |
| TtAac no tag<br>reverse | CTAGCTCGAGCTATCATTAAACCAGATCCACCTTTAAAAGCTTTGCCGAATA<br>GTAGAATTTGC                               |
| Nb Xa-His8<br>forward   | TCACAAGCTTAAGGAGACAGTACA                                                                          |
| Nb Xa-His8<br>reverse   | CTAGTCCGGATTATTAATGGTGATGGTGATGGTGGTGATGTTGCTGGTC<br>GCGGTACGACCTTCGATCGCACGGTCTGAGGAGACGGTGACCTG |
| Q302K reverse           | CTCGAGTCTAGATCATTTGCCGAATAGTAGAATTTTCAATTGATCGTATAT<br>GGACAACAC                                  |
| K30A forward            | CTGCAGCAGTTAGTGCTACAGCTGC                                                                         |
| K30A reverse            | GCAGCTGTAGCACTAACTGCTGCAG                                                                         |
| R88A forward            | GCCAACGTTATAGCTTATTTTCCAACCCAG                                                                    |
| R88A reverse            | CTGGGTTGGAAAATAAGCTATAACGTTGGC                                                                    |
| N96A forward            | TCCAACCCAGGCATTGGCTTTTGCTTTTAG                                                                    |
| N96A reverse            | CTAAAAGCAAAGCCAATGCCTGGGTTGGA                                                                     |
| R100A forward           | GAACCTTGCTTTTGCTGATAAGTTTAAGGC                                                                    |
| R100A reverse           | GCCTTAACTTATCAGCAAAGCAAAGTTC                                                                      |
| G192A forward           | GGTCCATCCGTGGCCGCTATTGTTGTTTACAGA                                                                 |
| G192A reverse           | TCTGTAAACAACAATAGCGGCCACGGATGGACC                                                                 |

| Oligonucleotide         | Sequence 5'-3'                                                                                    |
|-------------------------|---------------------------------------------------------------------------------------------------|
| TtAac no tag<br>forward | CATGACATGTCTAAACAAGAACTAAAATTTTAGGAATGCCACCCTTCGTG                                                |
| TtAac no tag<br>reverse | CTAGCTCGAGCTATCATTAACCAGATCCACCTTTAAAAGCTTTGCCGAATA<br>GTAGAATTTGC                                |
| Nb Xa-His8<br>forward   | TCACAAGCTTAAGGAGACAGTACA                                                                          |
| Nb Xa-His8<br>reverse   | CTAGTCCGGATTATTAATGGTGATGGTGATGGTGGTGATGTTGCTGGTC<br>GCGGTACGACCTTCGATCGCACGGTCTGAGGAGACGGTGACCTG |
| Q302K reverse           | CTCGAGTCTAGATCATTGCGGAATAGTAGAATTTCAATTGATCGTATAT<br>GGACAACAC                                    |
| K30A forward            | CTGCAGCAGTTAGTGCTACAGCTGC                                                                         |
| K30A reverse            | GCAGCTGTAGCACTAACTGCTGCAG                                                                         |
| R88A forward            | GCCAACGTTATAGCTTATTTTCCAACCCAG                                                                    |
| R88A reverse            | CTGGGTTGGAAAATAAGCTATAACGTTGGC                                                                    |
| N96A forward            | TCCAACCCAGGCATTGGCTTTTGCTTTTAG                                                                    |
| N96A reverse            | CTAAAAGCAAAGCCAATGCCTGGGTTGGA                                                                     |
| R100A forward           | GAACCTTGCTTTTGCTGATAAGTTTAAGGC                                                                    |
| R100A reverse           | GCCTTAACTTATCAGCAAAGCAAAGTTC                                                                      |
| G192A forward           | GGTCCATCCGTGGCCGCTATTGTTGTTTACAGA                                                                 |
| G192A reverse           | TCTGTAACAACAATAGCGGCCACGGATGGACC                                                                  |
| I193A forward           | CCATCCGTGGCCGGTGCTGTTGTTTACAGAGGT                                                                 |
| I193A reverse           | ACCTCTGTAAACAACAGCACCGGCCACGGATGG                                                                 |
